# Supplementary material for: Aqueous solutions with information on solids: room-temperature phosphorescence of polysaccharide–benzophenone complexes
Source: Royal Society of Chemistry journal article supplement (doi:10.1039/d2ra08205e), 2023-01-01
Supplement: d2ra08205e1.pdf [file d2ra08205e1.pdf]

## Electronic Supplementary Information

### Aqueous solutions with information on solids: room-temperature phosphorescence of polysaccharide–benzophenone complexes

Masafumi Okuno,<sup>a</sup> Keita Yamana,<sup>a</sup> Riku Kawasaki,<sup>a</sup> Yuto Konishi,<sup>b</sup> Toshikazu Ono,<sup>b</sup>  
Tsutomu Ishi-i<sup>c</sup> and Atsushi Ikeda<sup>a,\*</sup>

<sup>a</sup>Applied Chemistry Program, Graduate School of Advanced Science and Engineering, Hiroshima University, 1-4-1 Kagamiyama, Higashi-Hiroshima 739-8527, Japan.

<sup>b</sup>Department of Chemistry and Biochemistry, Graduate School of Engineering, Kyushu University, 744 Motooka, Nishi-ku, Fukuoka 819-0395, Japan.

<sup>c</sup>Department of Biochemistry and Applied Chemistry, National Institute of Technology, Kurume College, 1-1-1 Komorino, Kurume 830-8555, Japan.

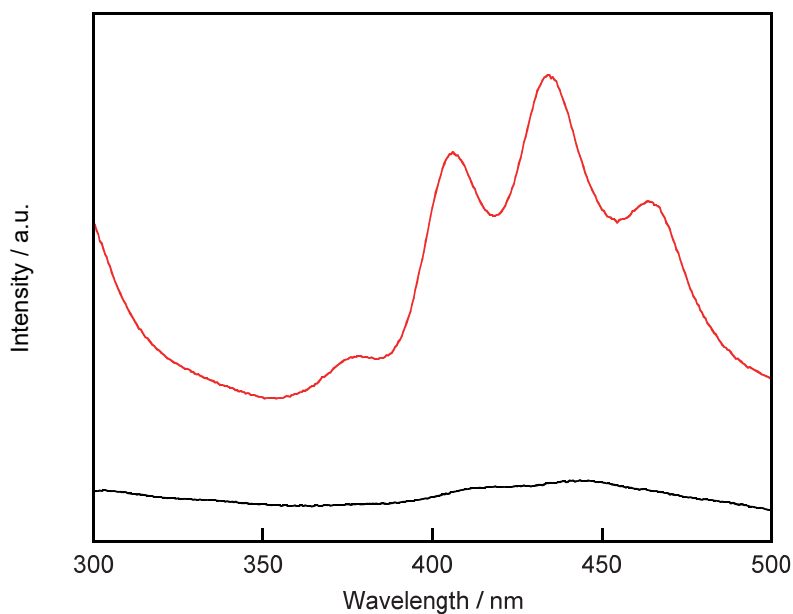

**Fig. S1** Fluorescence spectra of the aqueous solutions of the CGN-1 (black) and CGN-2 (red) complexes prepared by the grinding method (1 cm cell, 20 °C).  $\lambda_{\text{ex}} = 270$  nm, ex/em slits = 10/10 nm,  $[1] = [2] = 0.50$  mM.

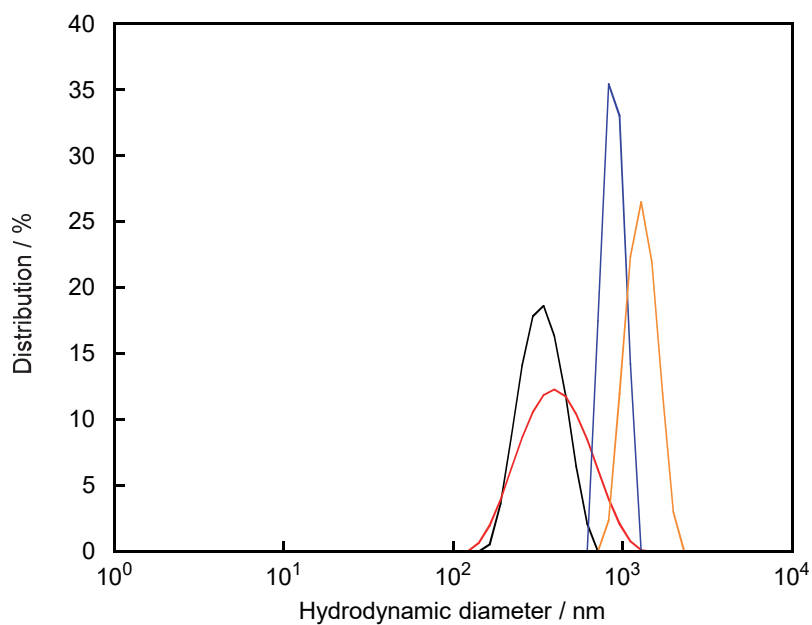

**Fig. S2** DLS size-distribution profile for the aqueous solutions of the CGN-1 (black) and CGN-2 (red) complexes prepared by the HSVM method and the CGN-1 (blue) and CGN-2 (orange) complexes prepared by the grinding method.

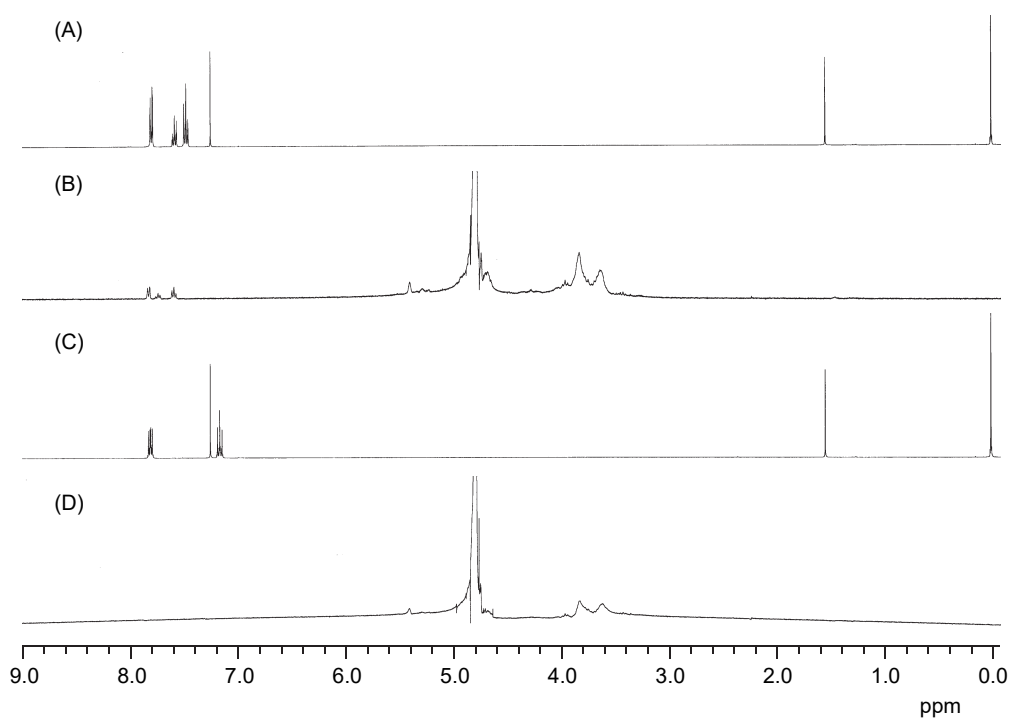

**Fig. S3** <sup>1</sup>H NMR spectra of (A) **1** in CDCl<sub>3</sub>, (B) the CGN-1 complex in D<sub>2</sub>O, (C) **2** in CDCl<sub>3</sub>, and (D) the CGN-2 complex in D<sub>2</sub>O (400 MHz, 20 °C). These complexes were prepared by the grinding method.

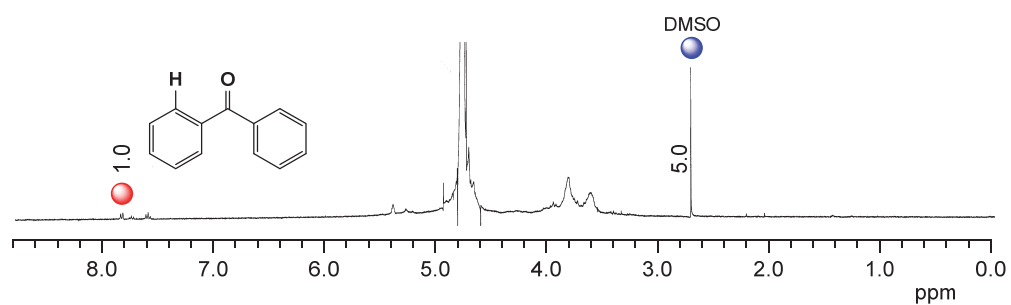

**Fig. S4** <sup>1</sup>H NMR spectra of the CGN-1 complex in D<sub>2</sub>O with DMSO as the internal standard (400 MHz, 20 °C, [DMSO] = 0.145 mM). The complex was prepared by the grinding method.
